# Supplementary material for: Molecular mechanism for direct actin force-sensing by α-catenin
Source: eLife journal article supplement (doi:10.7554/elife.62514), 2020-09-24
Supplement: supp [file elife-62514-supp-v1.zip]

|                    |                    |                                              |                                  |               |         |                    |
|--------------------|--------------------|----------------------------------------------|----------------------------------|---------------|---------|--------------------|
| <b>A</b>           | Vinculin           | 866                                          | PEGEVPPP-RPPPPEEKDEEFPEQKAGEVINQ | H0 (catenins) | H1      | PMMMAARQLHDEARKWSS |
|                    | $\alpha$ E-catenin | 664                                          | IAGQSARAIMAQLPQEQAQAKIAEQVAS     |               |         | FQEEKSKLDAEVSKWDD  |
|                    | $\alpha$ N-catenin | 663                                          | IAGQSARAIMAQLPQEEKAKIAEQVEI      |               |         | FHQEKSCLDAEVAKWDD  |
|                    | $\alpha$ T-catenin | 654                                          | --GKTDRAKMTQLPEAAEKEKIAEQVAD     |               |         | FKKVKSKLDAEIEIWDD  |
|                    |                    |                                              | ..*.....*... ..**..              |               |         | .. ..*...*...*     |
|                    |                    |                                              |                                  | H2            | H3      |                    |
| Vinculin           | 915                | KGNDIIAAAKRMALLMAEMSRLVRGGSGTKR              | --ALI                            | QCAKDI        | AKASDEV | T                  |
| $\alpha$ E-catenin | 708                | SGNDIIIVLAKQMCMIMMEMTDF                      | TRGKG                            | PLKNTSD       | VISA    | AKKIAEAGSRMD       |
| $\alpha$ N-catenin | 707                | SGNDIIIVLAKQMCMIMMEMTDF                      | TRGKG                            | PLKNTSD       | VINA    | AKKIAEAGSRMD       |
| $\alpha$ T-catenin | 696                | TSNDIIIVLAKNMCMIMMEMTDF                      | TRGKG                            | PLKHTTD       | VIA     | AKMISESGSRMD       |
|                    |                    |                                              | ..****.....*.....*               |               |         | .....*             |
|                    |                    |                                              |                                  | H4            |         |                    |
| Vinculin           | 963                | RLAKEVAKQCTDKRIRTNLLQVCERIPTISTQLKILSTVKATML | --GR                             | TN            |         |                    |
| $\alpha$ E-catenin | 758                | KLGRTIADHCPDSACKQDLLAYLQRIALYCHQLNIC         | SKVKA                            | EVQNL         | GGEL    |                    |
| $\alpha$ N-catenin | 757                | KLARAVADQCPDSACKQDLLAYLQRIALYCHQLNIC         | SKVKA                            | EVQNL         | GGEL    |                    |
| $\alpha$ T-catenin | 746                | VLARQIANQCPDPSCKQDLLAYLEQIKFYSHQLKICSQVKA    | EIQNL                            | GGEL          |         |                    |
|                    |                    |                                              | .*...*.....*.....*               |               |         | .....*             |
|                    |                    |                                              |                                  | H5            |         |                    |
| Vinculin           | 1011               | ISDEESEQATEMLVHNAQNLMSVKETVREAEAA            | SIKIR                            | TDAGFT        | ----    |                    |
| $\alpha$ E-catenin | 808                | VV--SGVDSAMSLIQAAKNLMNAVVT                   | TVKAS                            | YVASTKYQ      | KSQGMAS | LNLP               |
| $\alpha$ N-catenin | 807                | IV--SGLDSATSLIQAAKNLMNAVVL                   | TVKAS                            | YVASTKYQ      | KVYGTA  | AVNSP              |
| $\alpha$ T-catenin | 796                | IM--SALDSVTSLIQAAKNLMNAVVT                   | TVKMS                            | YIASTKI       | IRIQSP  | AGPRHP             |
|                    |                    |                                              | .. ..*.....*.....*               |               |         | .....*             |
|                    |                    |                                              |                                  | CTE           |         |                    |
| Vinculin           | 1056               | -LRWVRKTPWYQ                                 | -----                            |               |         |                    |
| $\alpha$ E-catenin | 856                | AVSWKMKAPKPLVKREKQDETQTKIKRASQKKHVN          | PVQAL                            | SEFKAM        | DS      |                    |
| $\alpha$ N-catenin | 855                | VVSWKMKAPKPLVKREKPEEFQTRVRRGSQKKH            | ISPQAL                           | SEFKAM        | DS      |                    |
| $\alpha$ T-catenin | 844                | VVMWRMKAPAKPLIKREKPEETCAAVRRGSAKKKI          | HPLOVM                           | SEFRGR        | QI      |                    |
|                    |                    |                                              | ...*.....*                       |               |         |                    |

B

|              |      |                                                    |                    |                                 |
|--------------|------|----------------------------------------------------|--------------------|---------------------------------|
| Vinculin     | 866  | PEGEVPPPRPPPPEEKDEEFPEQKAGEVINQ                    | H1 (vinculin)      | PMMMAARQLHDEARKWSSK             |
| Metavinculin | 866  | PEGEVPPPRPPPPEEKDEEFPEQKAGEVINQ                    |                    | PMMMAARQLHDEARKWSSK             |
| Vinculin     | 916  | -----                                              |                    | -----                           |
| Metavinculin | 916  | PGIPAAEVGIGVVAEADAADAAGFPVPPDMEDDYEPELLMPSNQPVN    |                    | QP                              |
| Vinculin     | 916  | -----GNDIIAAAKRMALLMAEMSRLVRGGSGTKRAL              | H1' (metavinculin) | H2                              |
| Metavinculin | 966  | ILAAQSLHREATKWSSKGN                                |                    | DI IAAAKRMALLMAEMSRLVRGGSGTKRAL |
| Vinculin     | 948  | IQCAKDIAKASDEVTRLAKEVAKQCTDKRIRTNLLQVCERIPTISTQLKI | H3                 | H4                              |
| Metavinculin | 1016 | IQCAKDIAKASDEVTRLAKEVAKQCTDKRIRTNLLQVCERIPTISTQLKI |                    |                                 |
| Vinculin     | 998  | LSTVKATMLGRTNISDEESEQATEMLVHNAQNLMSVKETVREAEAA     | H5                 | SIK                             |
| Metavinculin | 1066 | LSTVKATMLGRTNISDEESEQATEMLVHNAQNLMSVKETVREAEAA     |                    | SIK                             |
| Vinculin     | 1048 | IRTDAGFTLRWVRKTPWYQ                                | CTE                |                                 |
| Metavinculin | 1116 | IRTDAGFTLRWVRKTPWYQ                                |                    |                                 |
