# Supplementary material for: Molecular mechanism for direct actin force-sensing by α-catenin
Source: eLife journal article supplement (doi:10.7554/elife.62514), 2020-09-24

**A**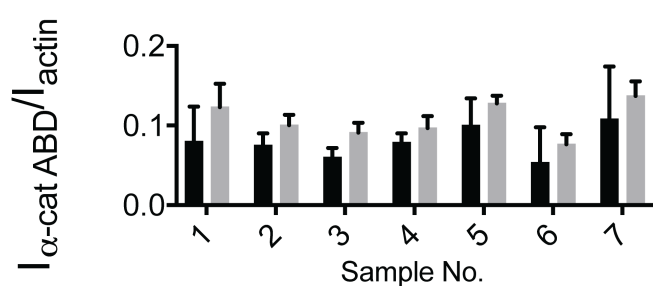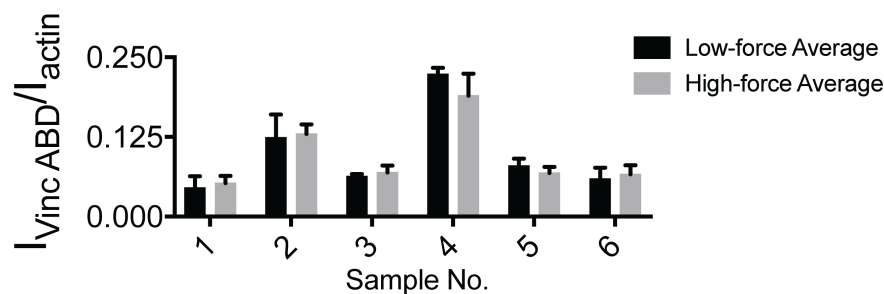**B**

Multiple filaments of different lengths attached to both beads

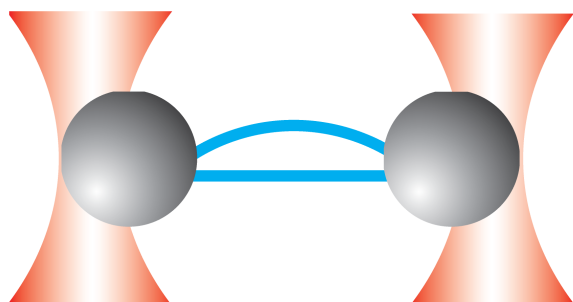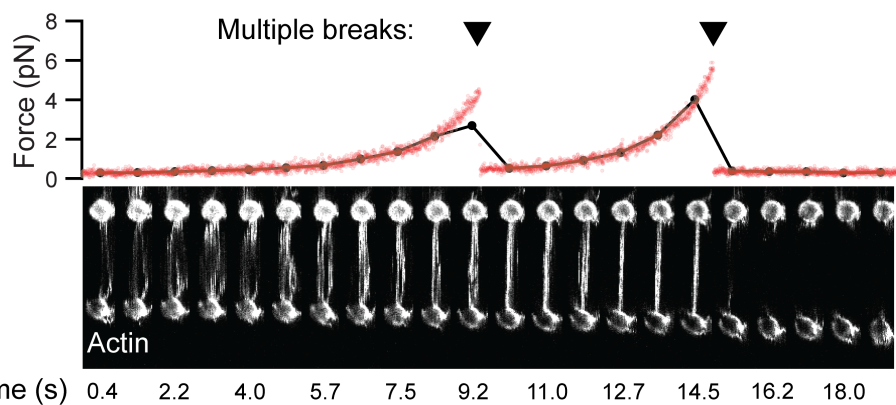**C**

Multiple filaments of different lengths, not all attached to both beads

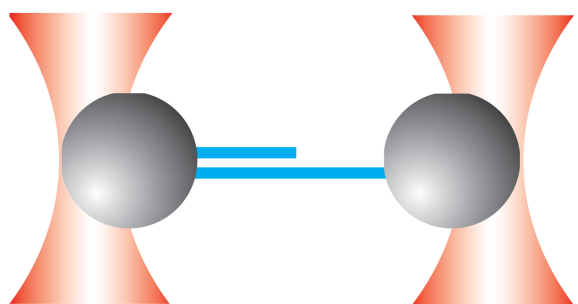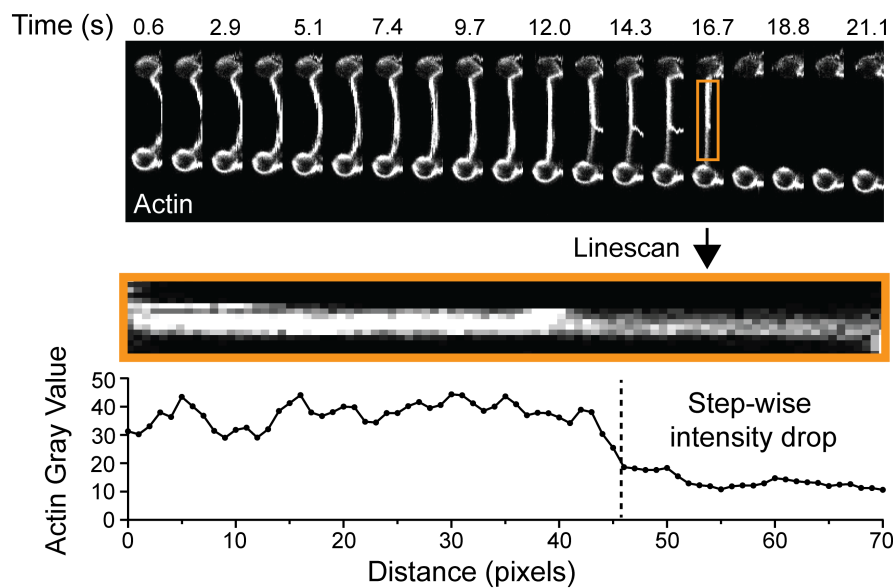**D**

Multiple filaments of identical length all attached to both beads

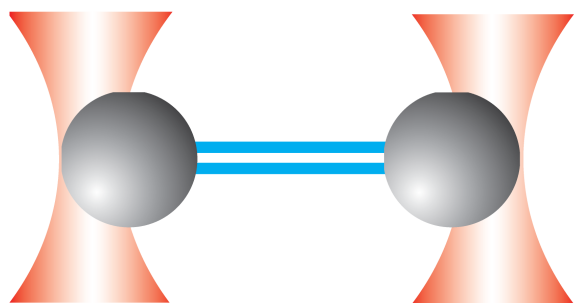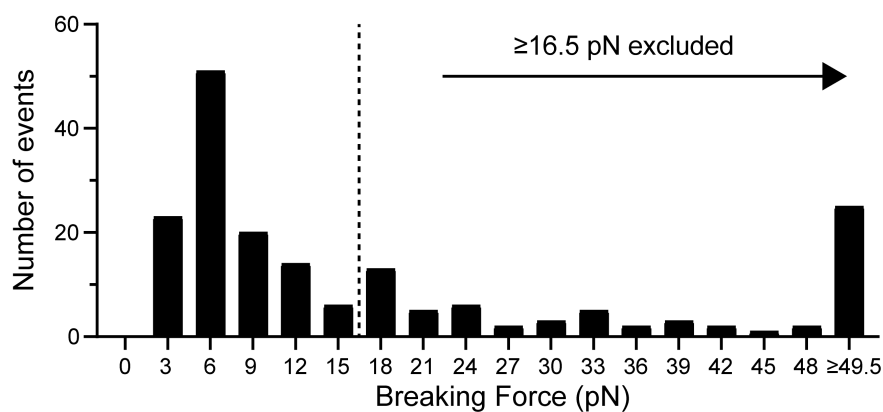

Supplement: supp [file elife-62514-supp-v1.zip]
