# Supplementary material for: Molecular mechanism for direct actin force-sensing by α-catenin
Source: eLife journal article supplement (doi:10.7554/elife.62514), 2020-09-24
Supplement: supp [file elife-62514-supp-v1.zip]

**A**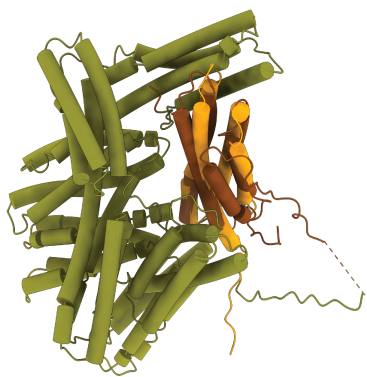**B**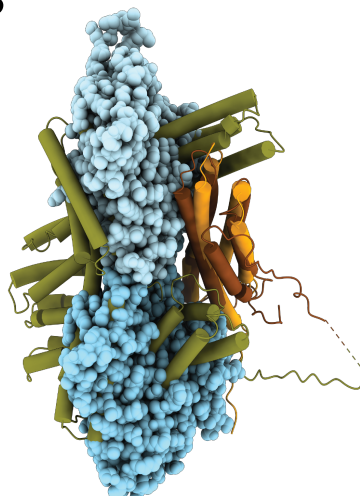

Post-bound MVinc ABD  
 Pre-bound Vinc ABD  
 Pre-bound Vinc NTD  
 Actin

**C**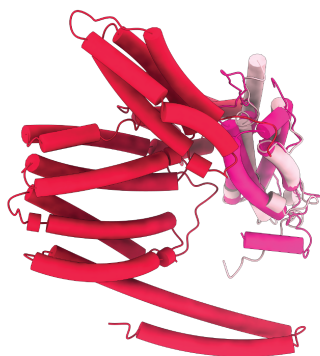**D**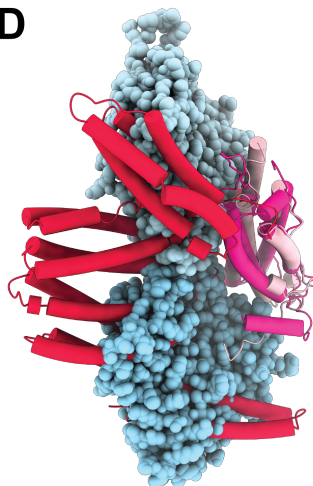

Post-bound  $\alpha$ -Cat ABD  
 Pre-bound  $\alpha$ -Cat ABD  
 Pre-bound  $\alpha$ -Cat NTD  
 Actin

Pre-bound  $\alpha$ -Cat: 4igg-B

**E**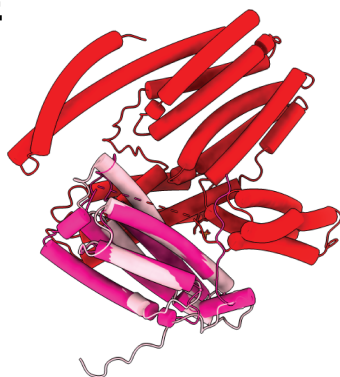**F**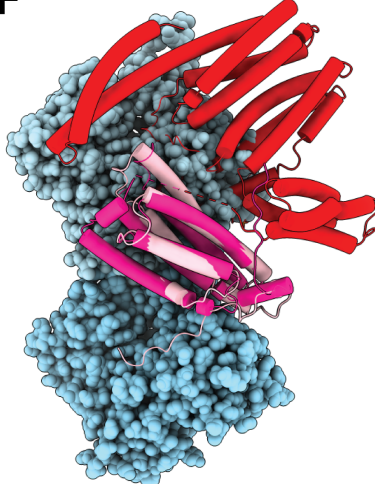

Post-bound  $\alpha$ -Cat ABD  
 Pre-bound  $\alpha$ -Cat ABD  
 Pre-bound  $\alpha$ -Cat NTD  
 Actin

Pre-bound  $\alpha$ -Cat: 4igg-A

**G**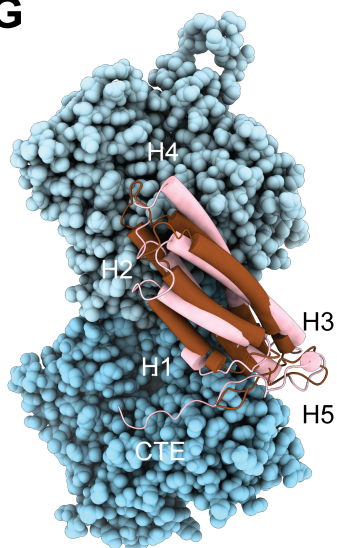

Pre-bound MVinc ABD  
 Post-bound  $\alpha$ Cat ABD
