# Supplementary figures and images for: Molecular mechanism for direct actin force-sensing by α-catenin
Source: eLife journal article supplement (doi:10.7554/elife.62514), 2020-09-24

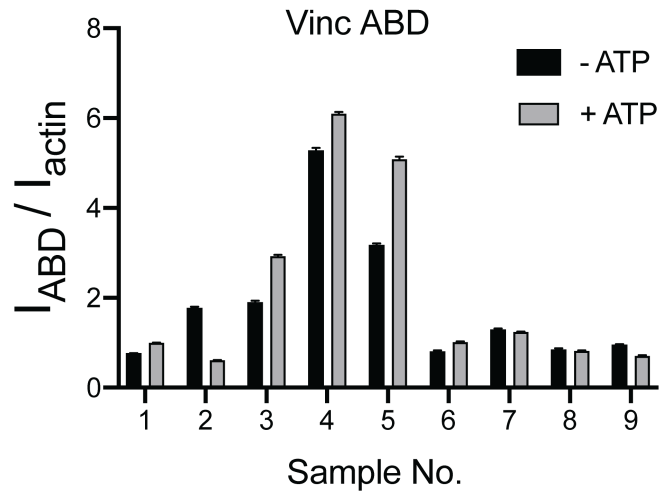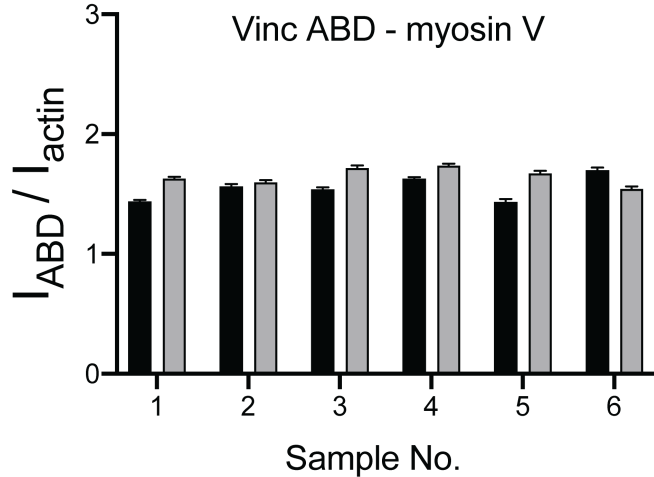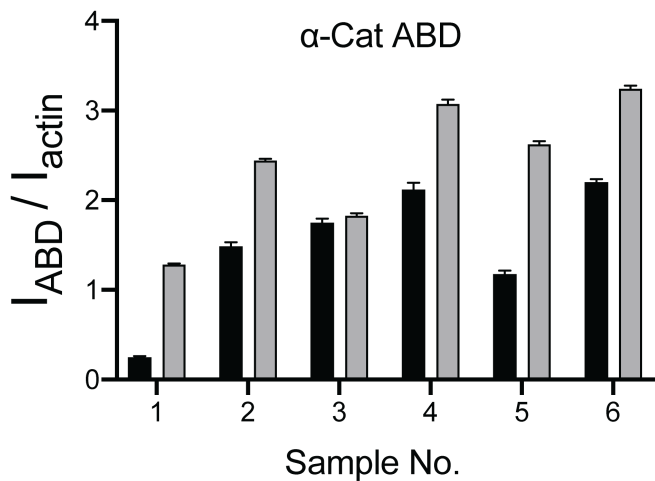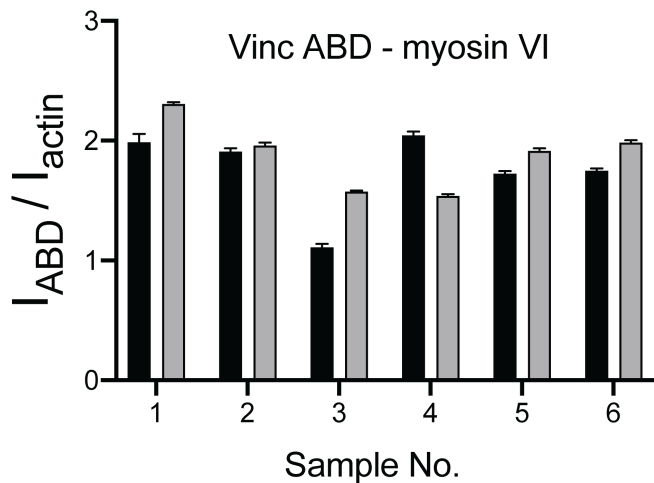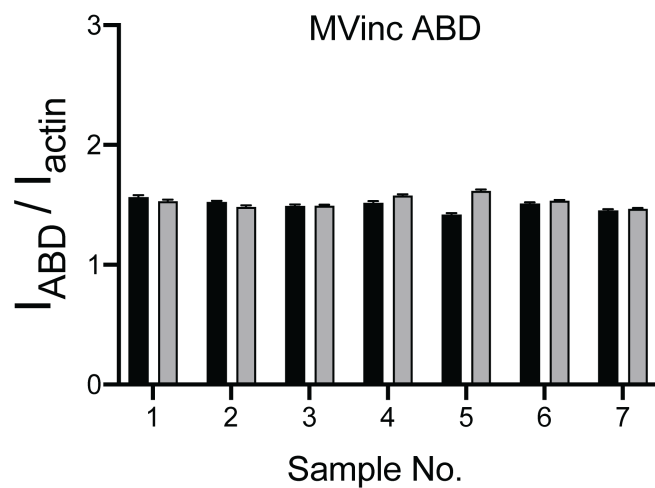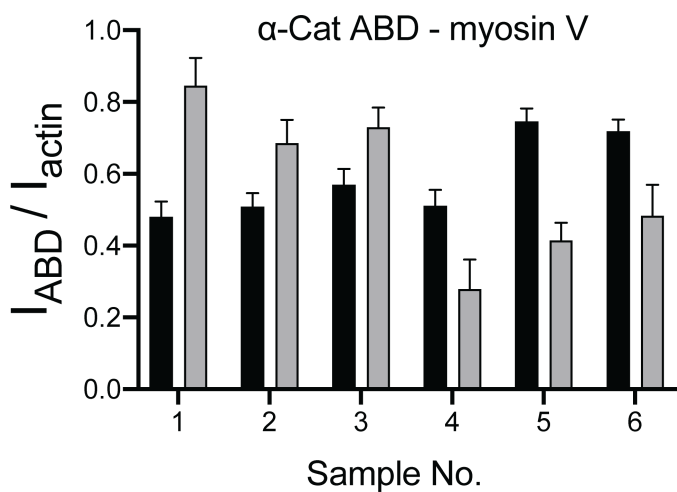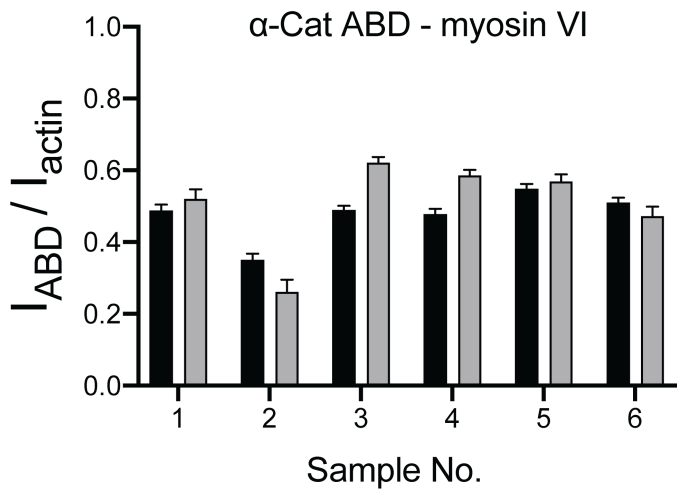

Supplement: supp [file elife-62514-supp-v1.zip]

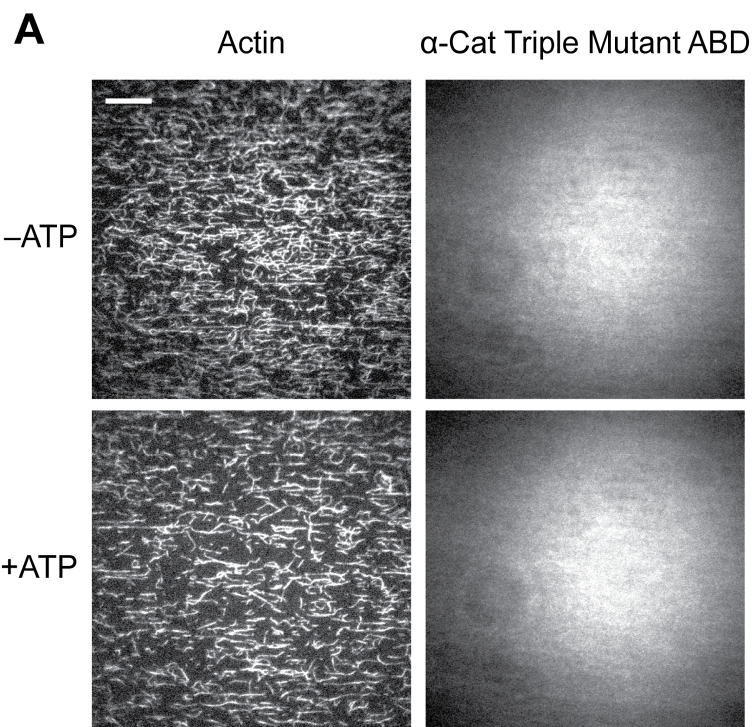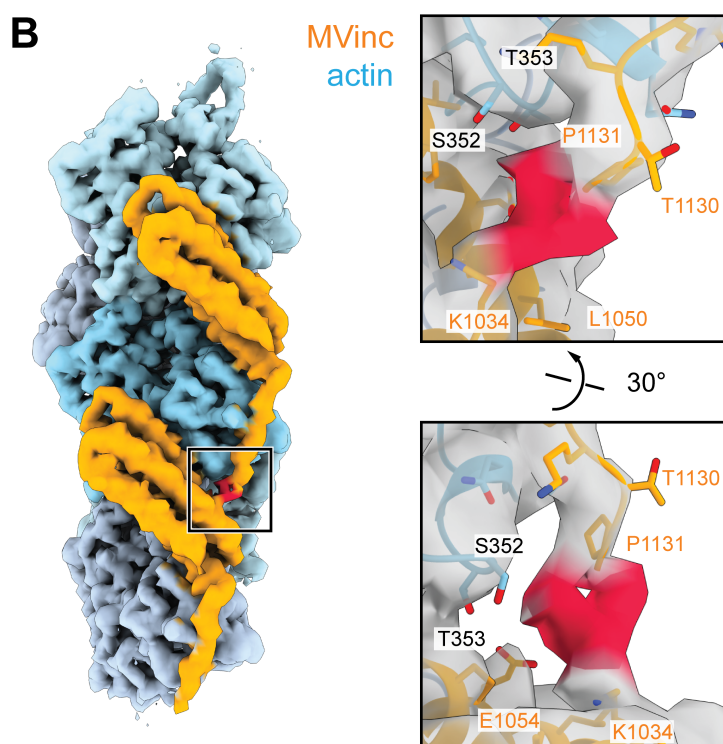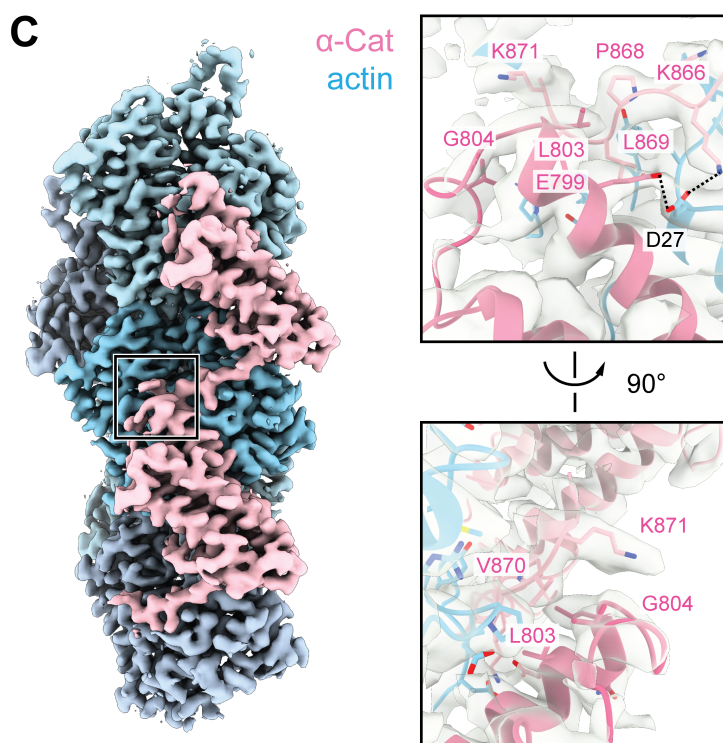

Supplement: supp [file elife-62514-supp-v1.zip]

**A**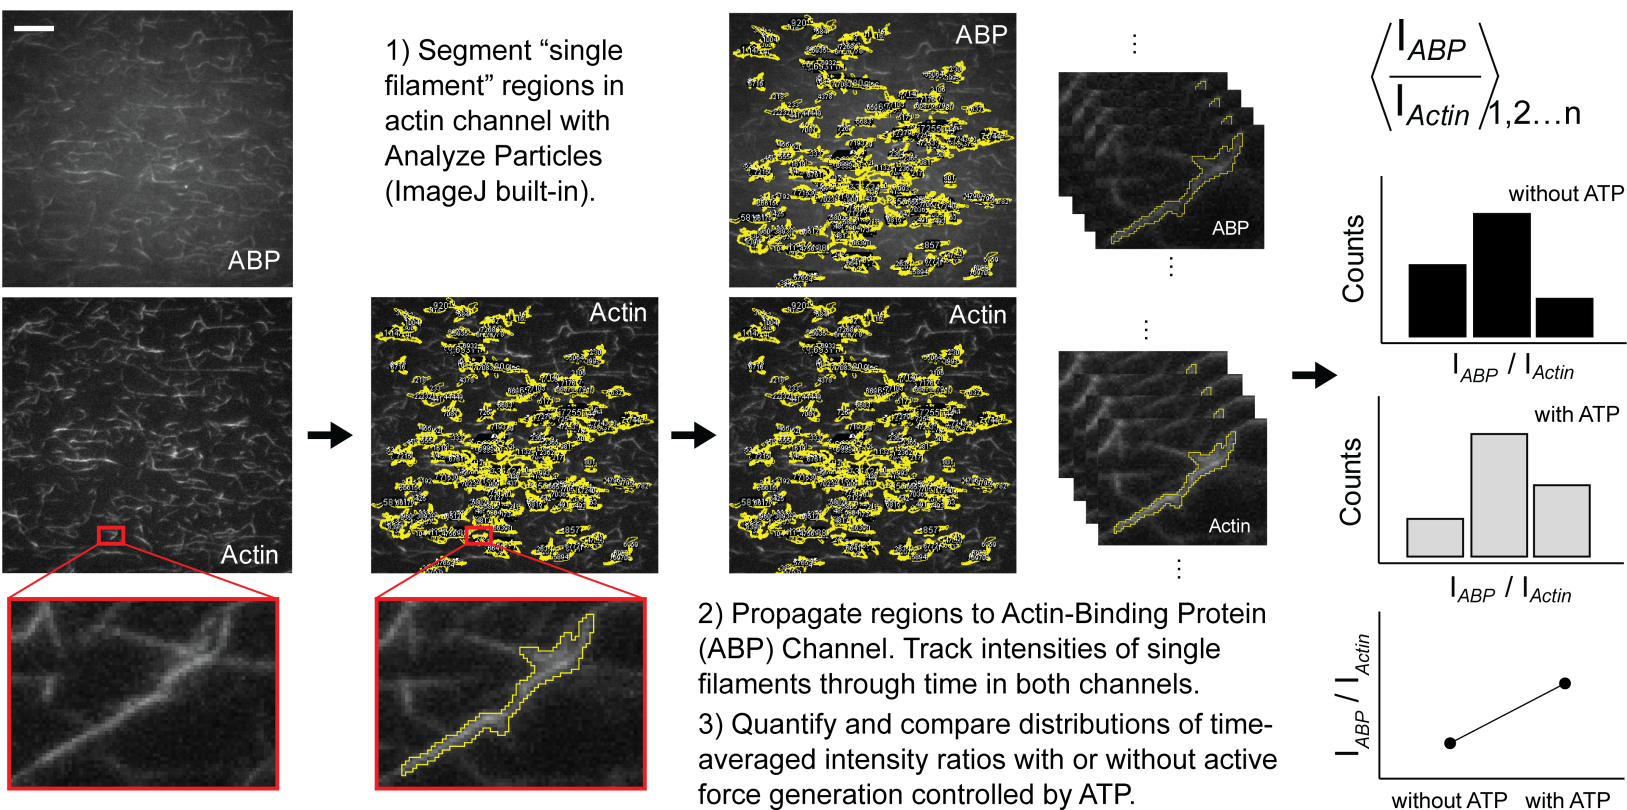**B**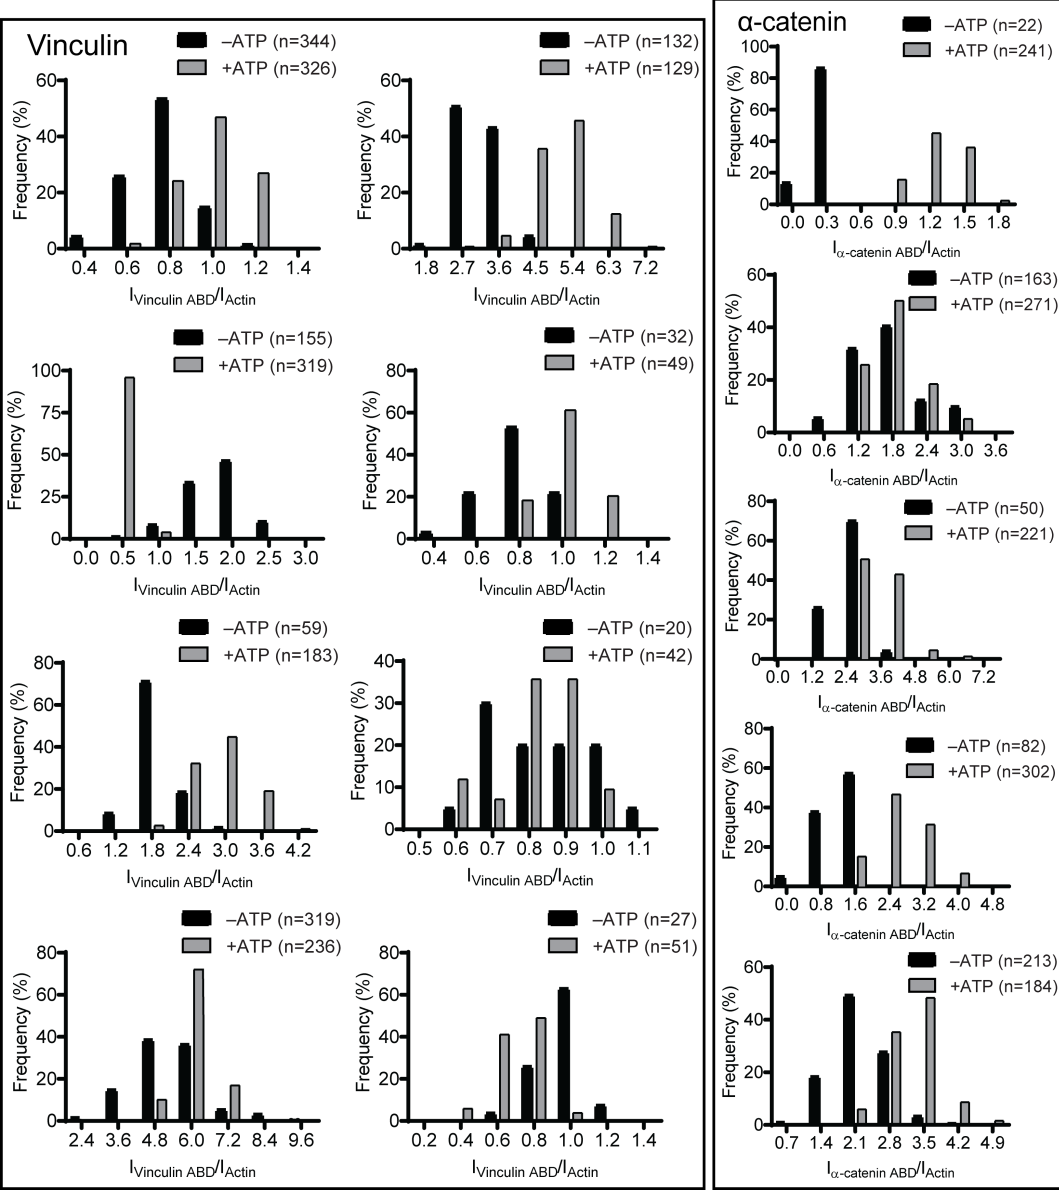**C**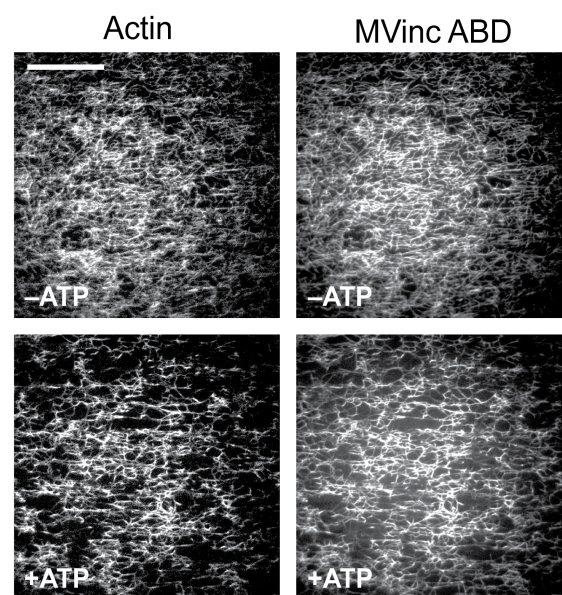**D**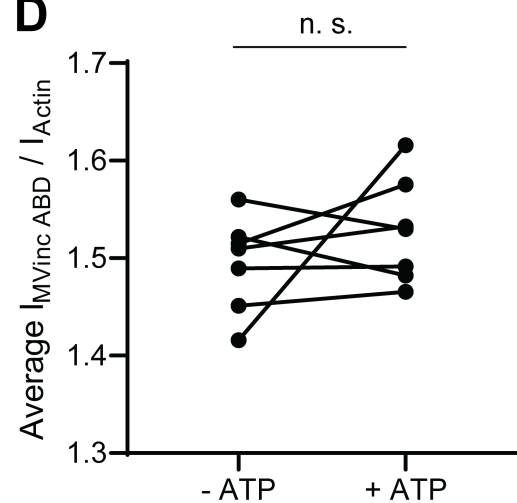

Supplement: supp [file elife-62514-supp-v1.zip]

Myosin  
VI

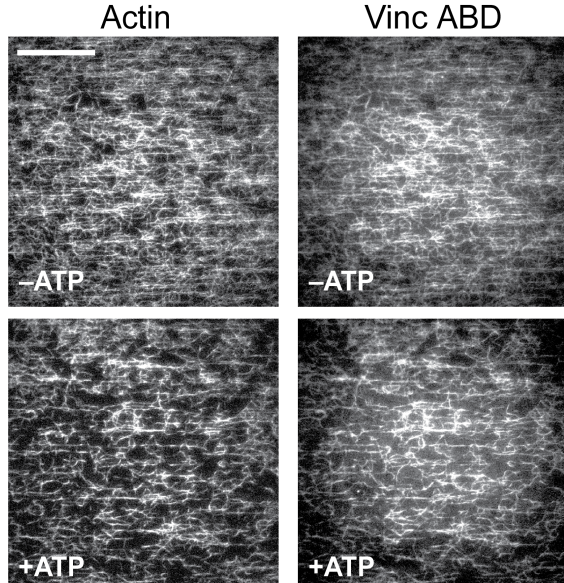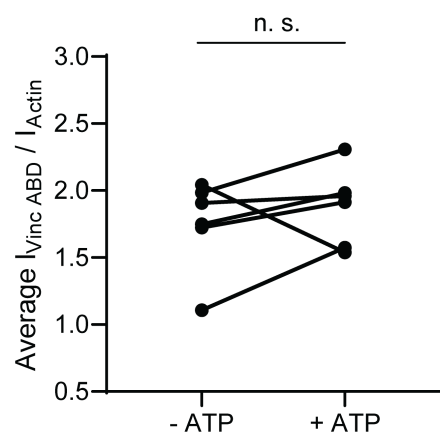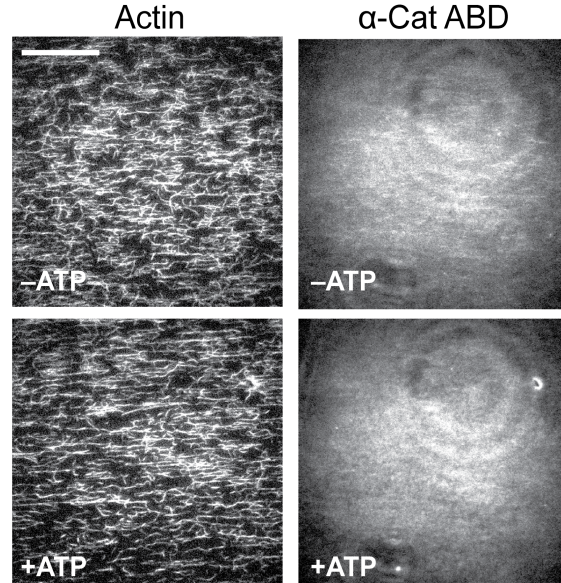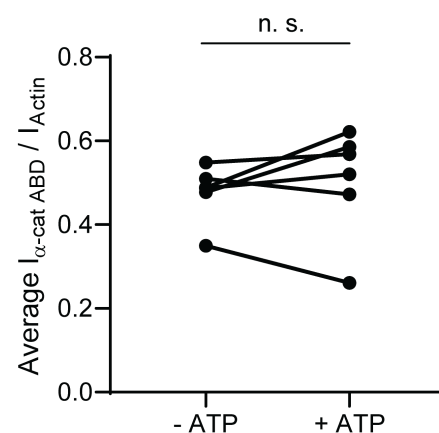

Myosin  
V

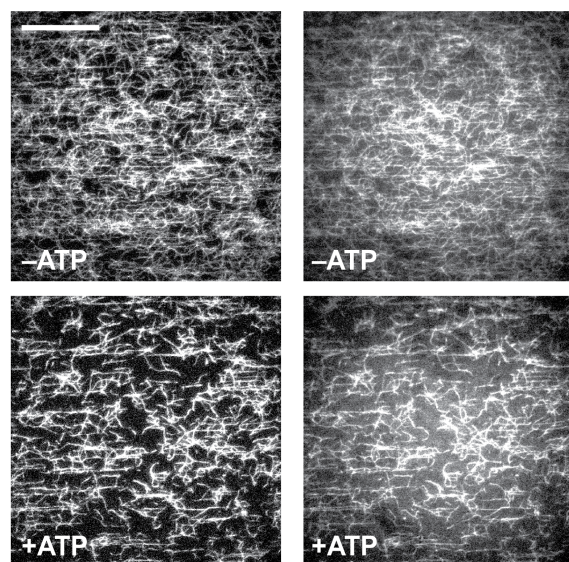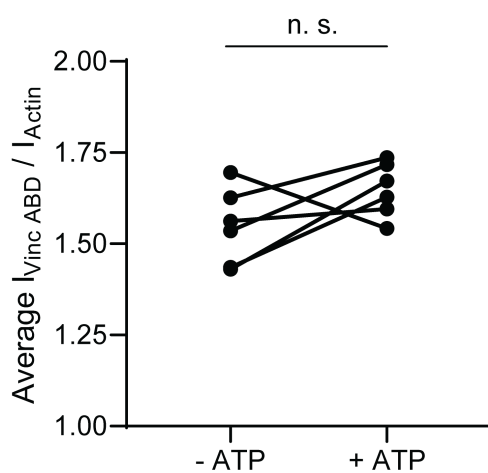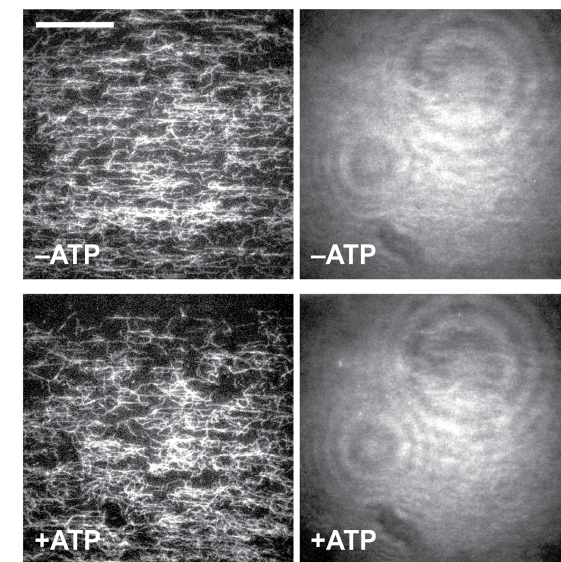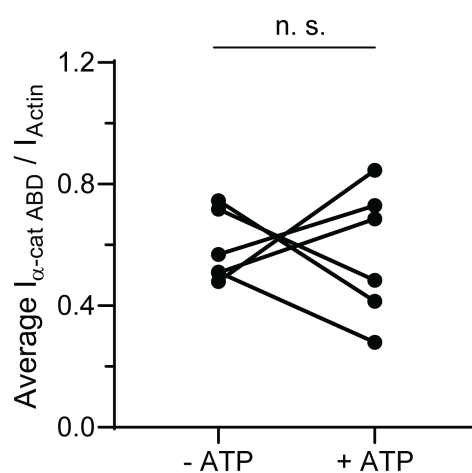

Supplement: supp [file elife-62514-supp-v1.zip]

**A**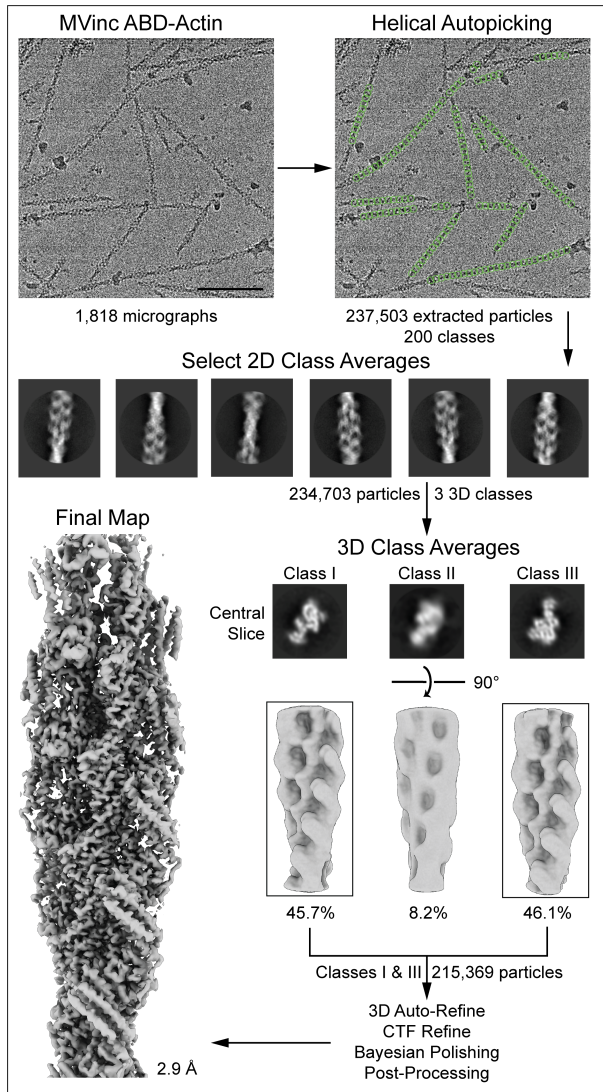**B**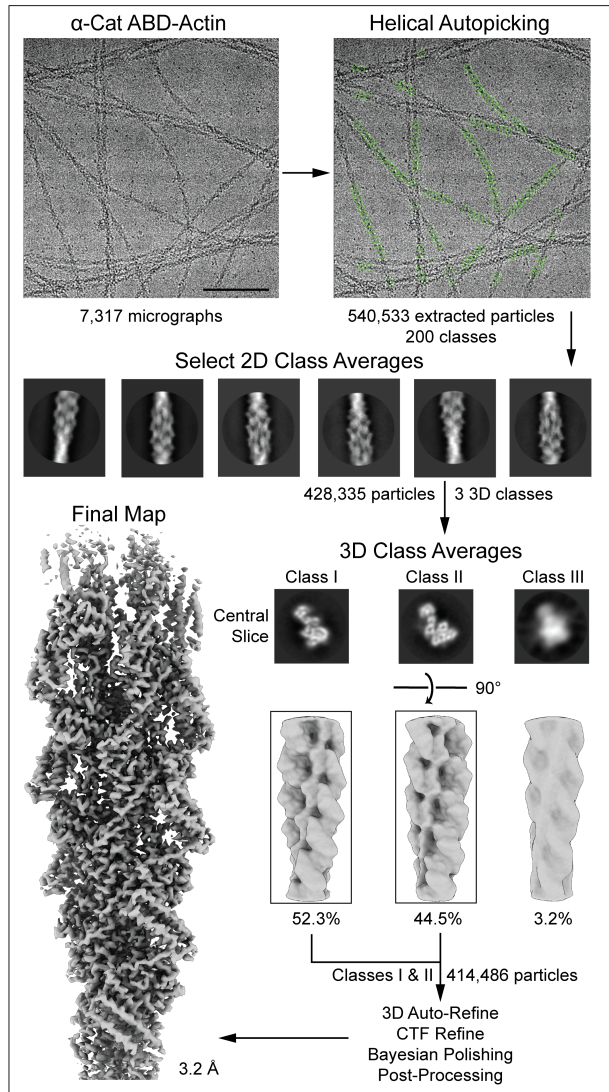**C**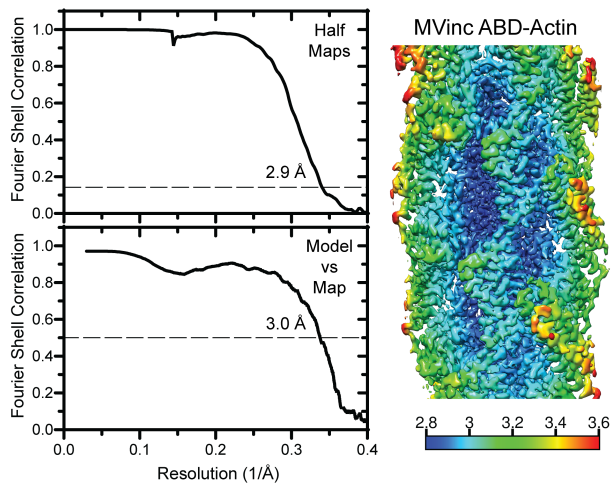**D**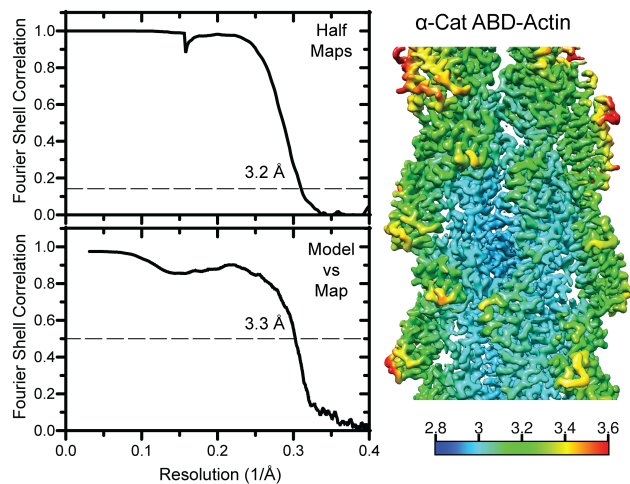

Supplement: supp [file elife-62514-supp-v1.zip]

## A $\alpha$ -catenin ABD $\Delta$ C

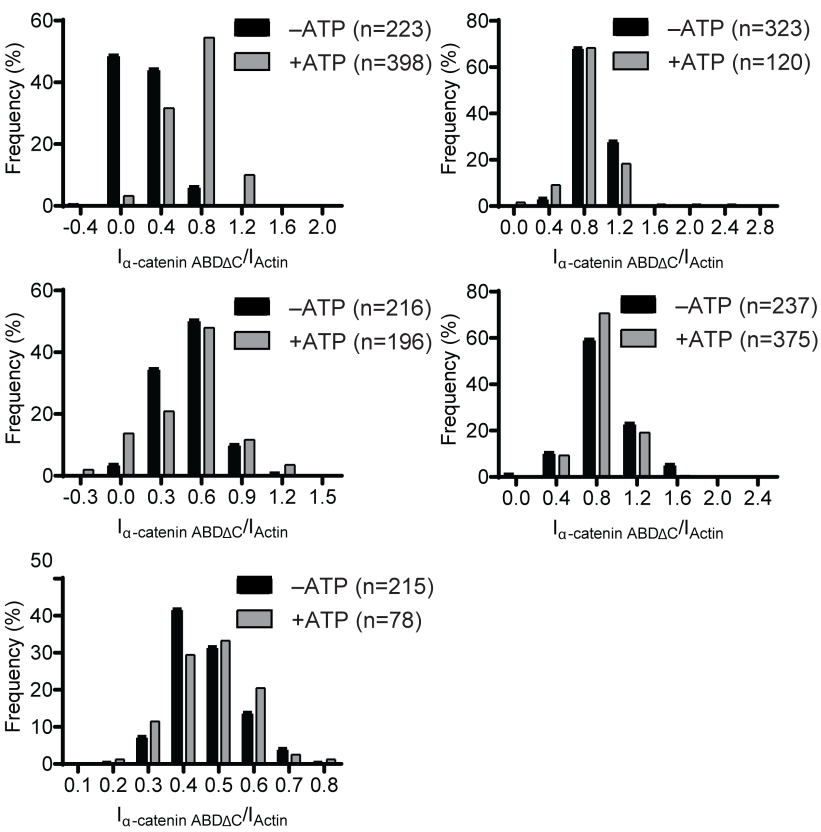

## B Vinculin ABD-NCSwap

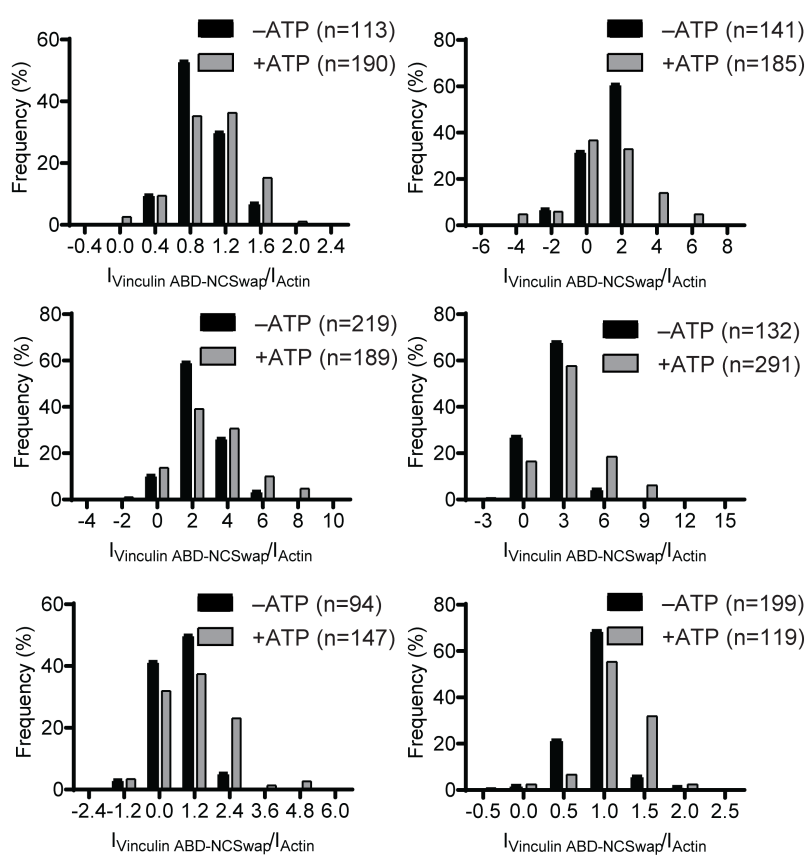

## C Vinculin ABD-NCSwap $\Delta$ C

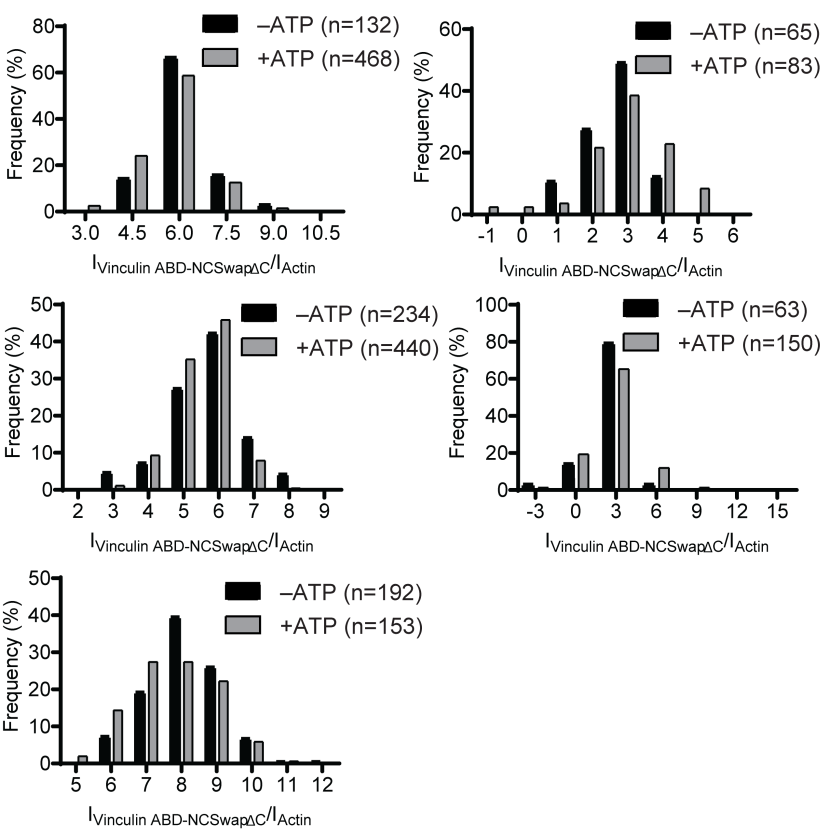

## D

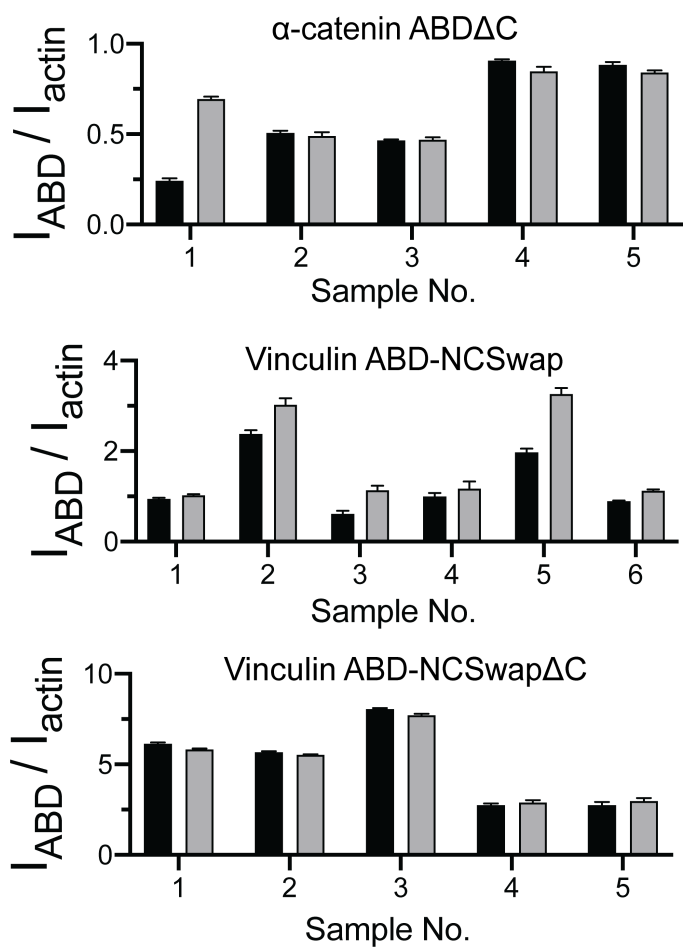

Supplement: supp [file elife-62514-supp-v1.zip]
